# Supplementary material
Source: publisher figshare collection journal article supplement (https://acs.figshare.com/ndownloader/files/8152631)
Supplement: Supplementary file 1 [file 8152631]

## Supporting Information

### **Cationically Substituted Bi<sub>0.7</sub>Fe<sub>0.3</sub>OCl Nanosheets as Li-Ion Battery Anodes**

Yoon Myung<sup>a,†#</sup>, Jaewon Choi<sup>b,d,#</sup>, Fei Wu<sup>a</sup>, Sriya Banerjee<sup>a</sup>, Eric H. Majzoub<sup>c</sup>,  
Jaewon Jin<sup>d</sup>, Seung Uk Son<sup>d</sup>, Paul V. Braun<sup>b</sup>, Parag Banerjee<sup>a, e\*</sup>

*a. Department of Mechanical Engineering and Materials Science,  
Washington University in St. Louis, St. Louis, MO 63130, USA*

*b. Department of Materials Science and Engineering,  
University of Illinois at Urbana-Champaign, Urbana, IL 61801, USA*

*c. Center for Nanoscience, Department of Physics and Astronomy, University of Missouri, St. Louis,  
MO 63121, USA*

*d. Department of Chemistry and Department of Energy Science, Sungkyunkwan University, Suwon 440-  
746, Korea*

*e. Institute of Materials Science and Engineering,  
Washington University in St. Louis, St. Louis, MO 63130, USA*

*f. Department of Nanotechnology and Advanced Materials Engineering, Sejong University, Seoul,  
05006, Korea*

#These authors contributed equally to this work.

\*Corresponding author, E-mail: [parag.banerjee@wustl.edu](mailto:parag.banerjee@wustl.edu)

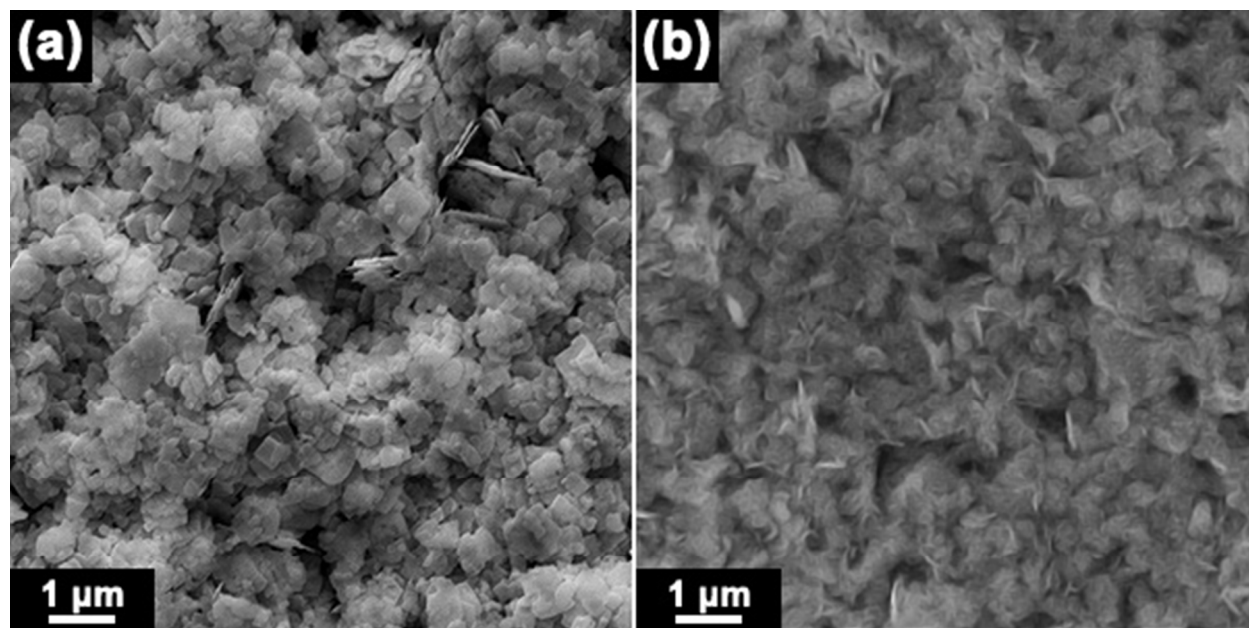

**Figure S1.** The SEM images shows general morphology of (a) as synthesized  $\text{Bi}_{0.7}\text{Fe}_{0.3}\text{OCl}$  and (b) 500 °C annealed  $\text{Bi}_{0.7}\text{Fe}_{0.3}\text{OCl}$  nanosheets.

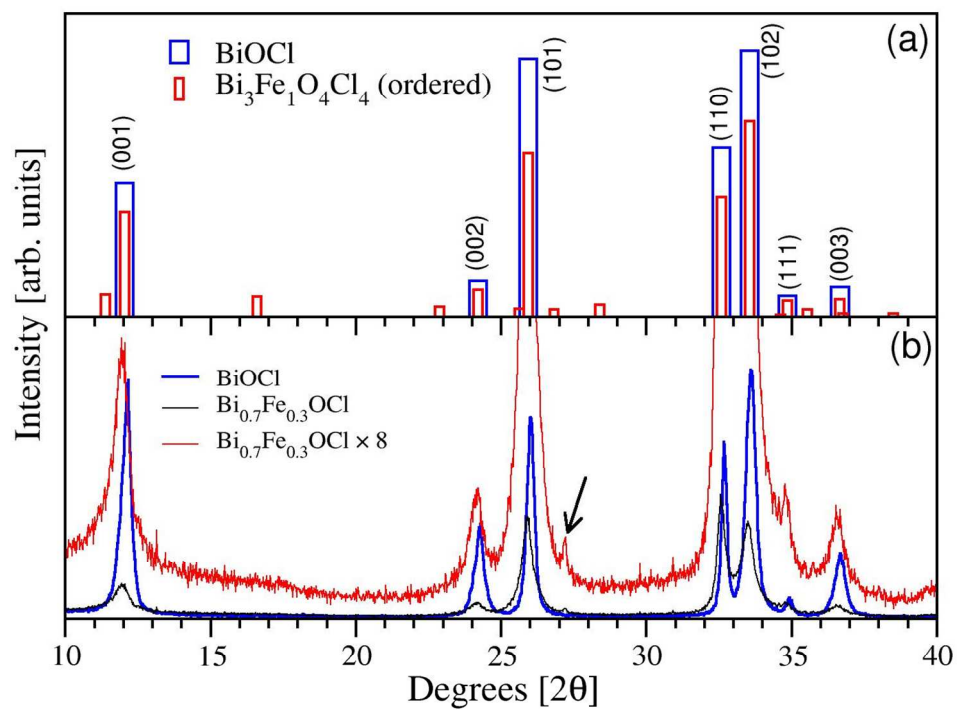

**Figure S2.** Simulated XRD for a 1x2x1 supercell of BiOCl with an ordered substitution of Fe on one of the four equivalent Bi sites (top panel). Experimental XRD of pure and Fe 30% substituted BiOCl (bottom panel).

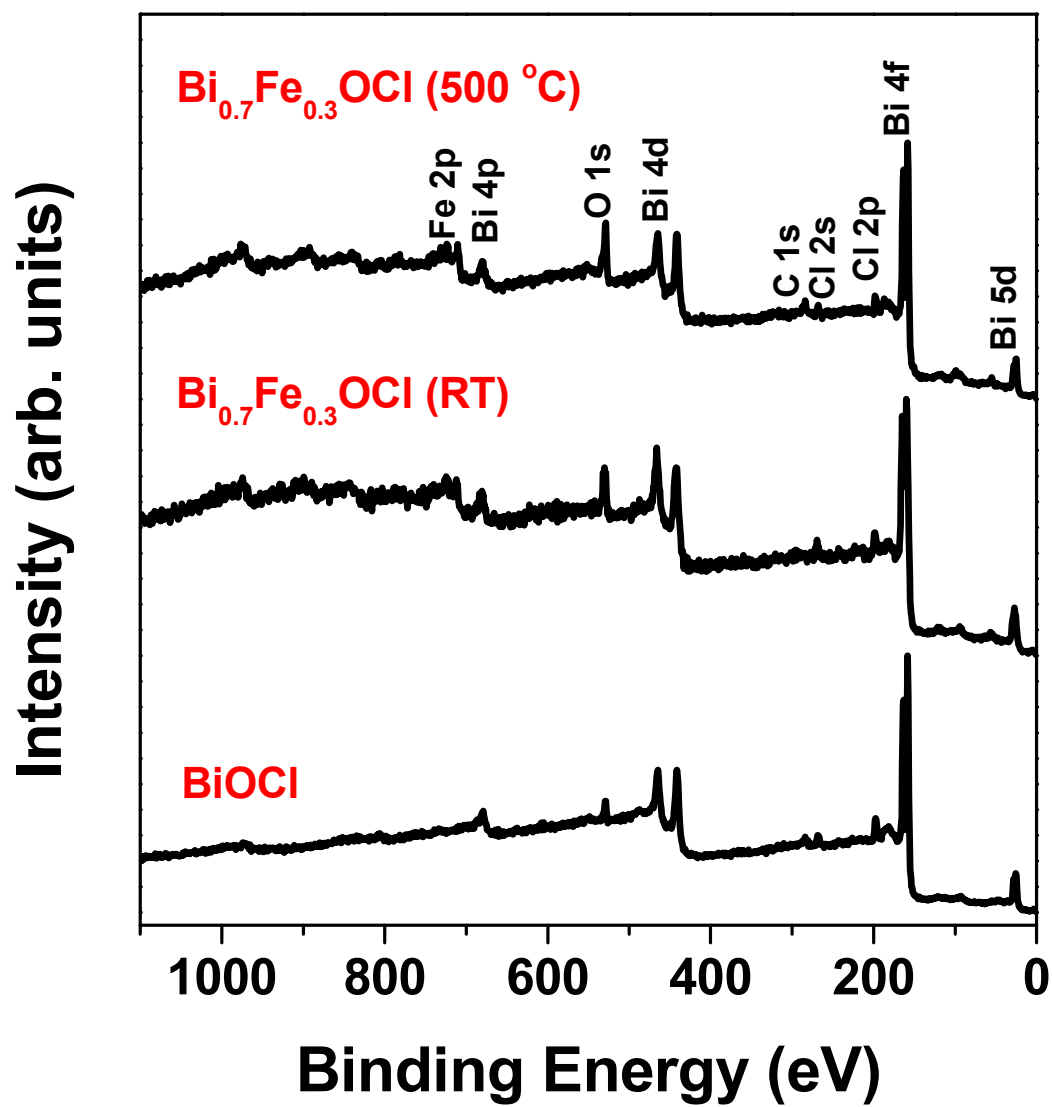

**Figure S3.** XPS survey spectra of  $\text{BiOCl}$ , as synthesized Fe doped  $\text{BiOCl}$  and 500 °C annealed samples.

#### ***S4: Chemistry of $\text{Bi}_{0.7}\text{Fe}_{0.3}\text{OCl}$ formation***

$\text{Bi}_{0.7}\text{Fe}_{0.3}\text{OCl}$  nanosheets can be successfully formed by room temperature hydrolysis of  $\text{Bi}(\text{NO}_3)_3$  and  $\text{FeCl}_3$  under acidic conditions (pH 3). Generally,  $\text{Bi}(\text{NO}_3)_3$  in D.I. water, dissociates to give  $\text{Bi}^{3+}$  ion and this  $\text{Bi}^{3+}$  readily hydrolyzes to form  $\text{BiO}^+$ , which is unstable in the presence of  $\text{Cl}^-$  anions, and precipitates as crystalline  $\text{BiOCl}$ .<sup>1</sup> On the other hand, the interaction of  $\text{FeCl}_3$  in aqueous environment is highly pH dependent. At low pH conditions,  $[\text{Fe}(\text{OH})]^{2+}$ ,  $[\text{Fe}(\text{OH})_2]^+$ ,  $[\text{Fe}_2(\text{OH})_2]^{4+}$  ions are formed leading to formation of  $\text{FeOOH}$ .<sup>2-5</sup> The  $\text{FeOOH}$  can react with  $\text{Cl}^-$  to form  $\text{FeOCl}$  in the same medium. This possible reaction sequence has been reported wherein,  $\text{FeOOH}$  is successfully converted to  $\text{FeOCl}$  and  $\text{Fe}_2(\text{OH})_3\text{Cl}$  in low pH conditions.<sup>6-8</sup>

Based on our XPS spectra, there is no detectable  $\text{Fe}^{2+}$  ionic state. Therefore, we suggest  $\text{FeOCl}$  is formed in  $\text{Bi}_{0.7}\text{Fe}_{0.3}\text{OCl}$  medium. In addition, the post thermal annealing step provides enough free energy for efficiently incorporating  $\text{Fe}^{3+}$  into  $\text{BiOCl}$  lattice. The entire reaction mechanism is suggested as follows:

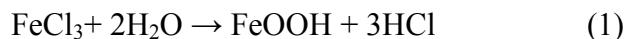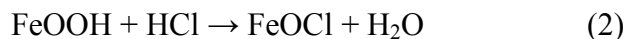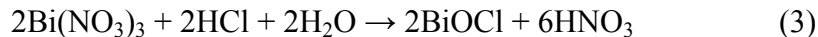

Overall adding (1) + (2) + (3), we obtain,

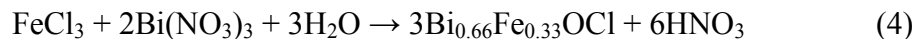

The experimentally obtained composition of  $\text{Bi}_{0.7}\text{Fe}_{0.3}\text{Cl}$  is close to the ideal  $\text{Bi}_{0.66}\text{Fe}_{0.33}\text{OCl}$  derived from the chemical reaction sequence given above.

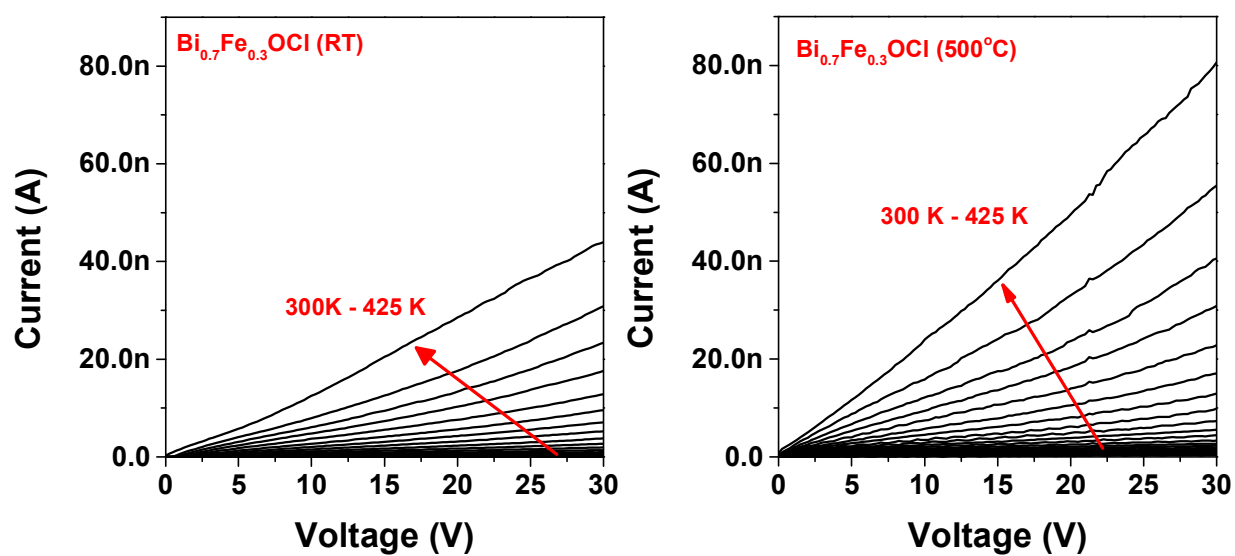

**Figure S4.** Temperature dependent I-V characteristics of as synthesized (left) and 500 °C annealed  $\text{Bi}_{0.7}\text{Fe}_{0.3}\text{OCl}$  (right) samples. The I-V characteristics of pure  $\text{BiOCl}$  have been reported in our previous publication.<sup>9</sup>

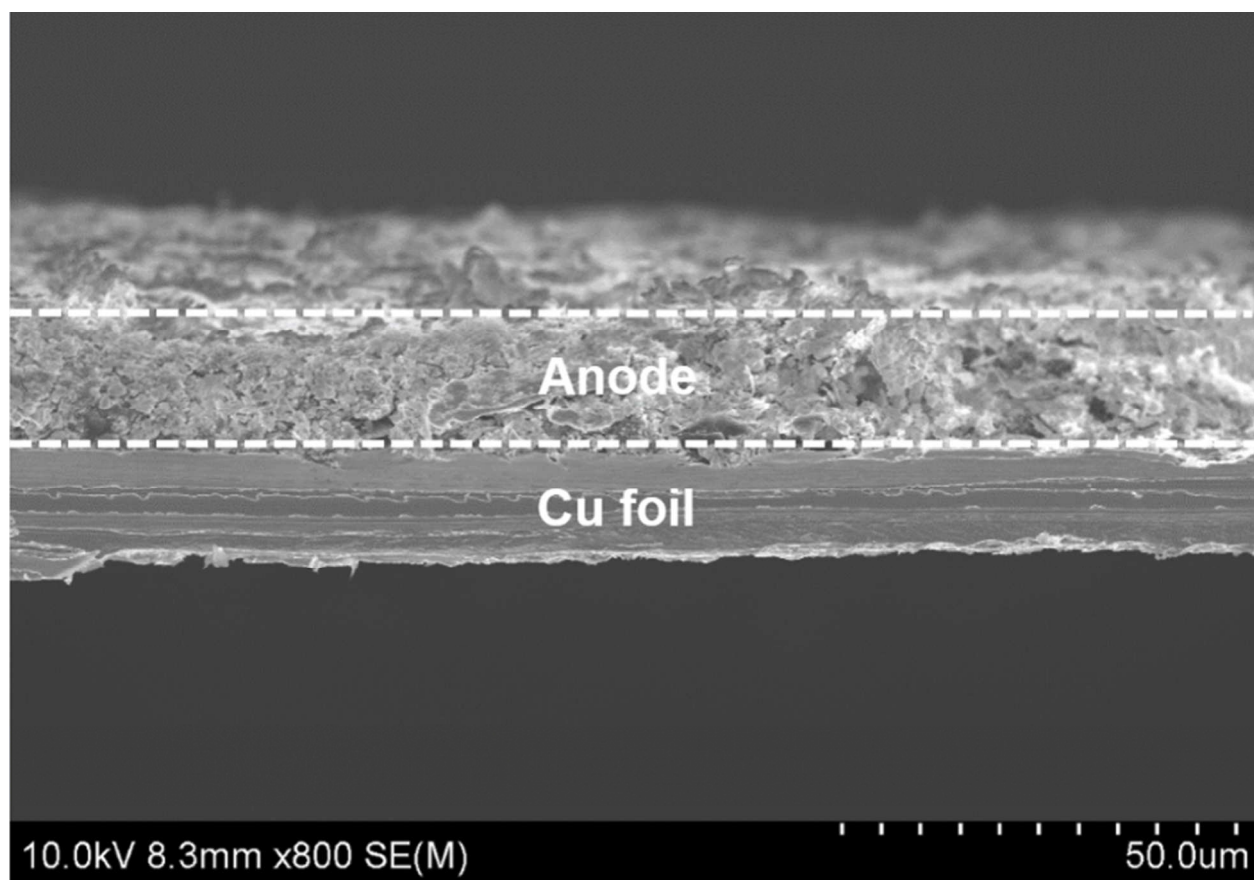

**Figure S5.** Cross-section SEM image of Li ion battery anode (average thickness  $\sim 20\ \mu\text{m}$ ) on Cu foil.

**(a)**

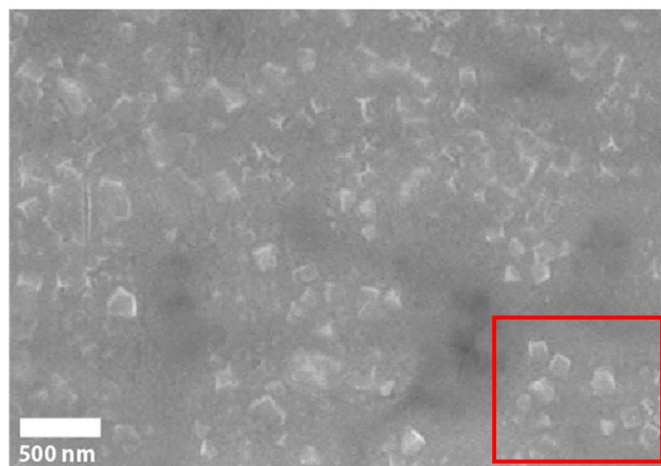

**(b)**

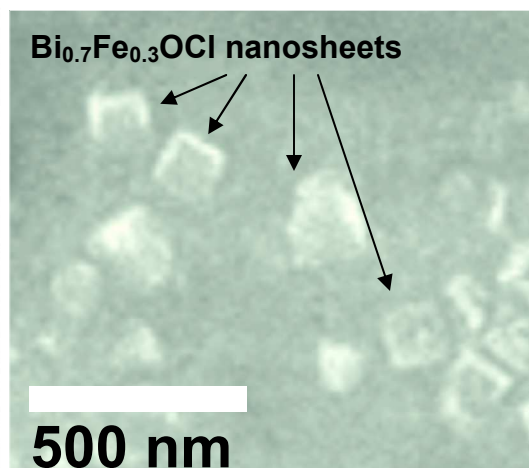

**Figure S6.** SEM image of post-test,  $\text{Bi}_{0.7}\text{Fe}_{0.3}\text{OCl}$  nanosheets mixed in the PVDF + carbon black binder.

(b) A zoomed image of the red box from image in (a) showing the intact square-like shapes of the  $\text{Bi}_{0.7}\text{Fe}_{0.3}\text{OCl}$  nanosheets.



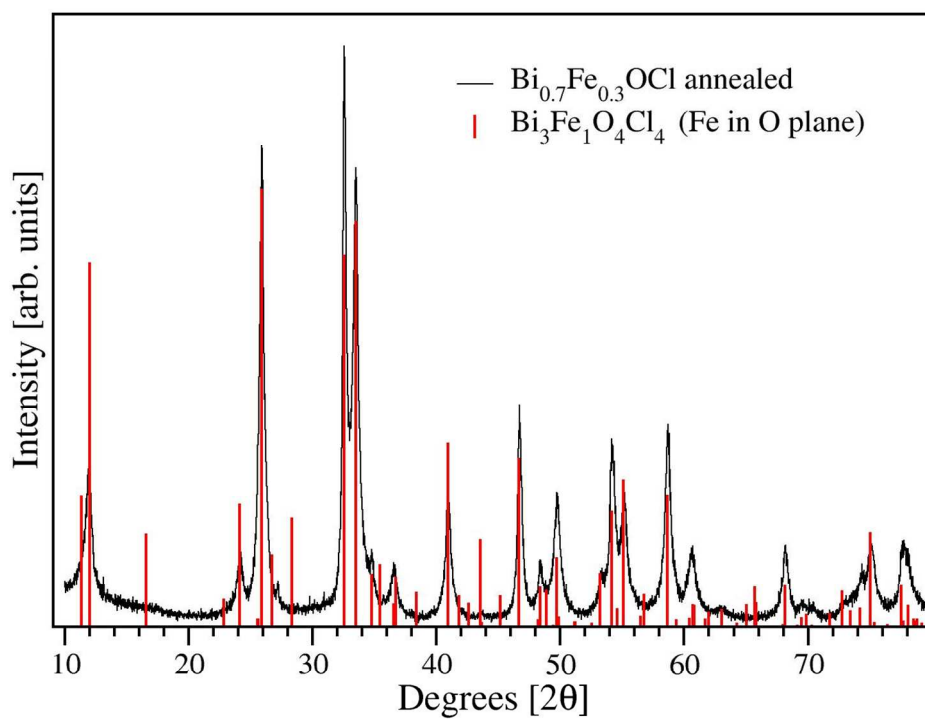

**Figure S7.** Simulated XRD for a 1x2x1 supercell of BiOCl with composition Bi<sub>3</sub>Fe<sub>1</sub>O<sub>4</sub>Cl<sub>4</sub> from the DFT-relaxed structure where Fe moves from the Bi plane to the O plane.

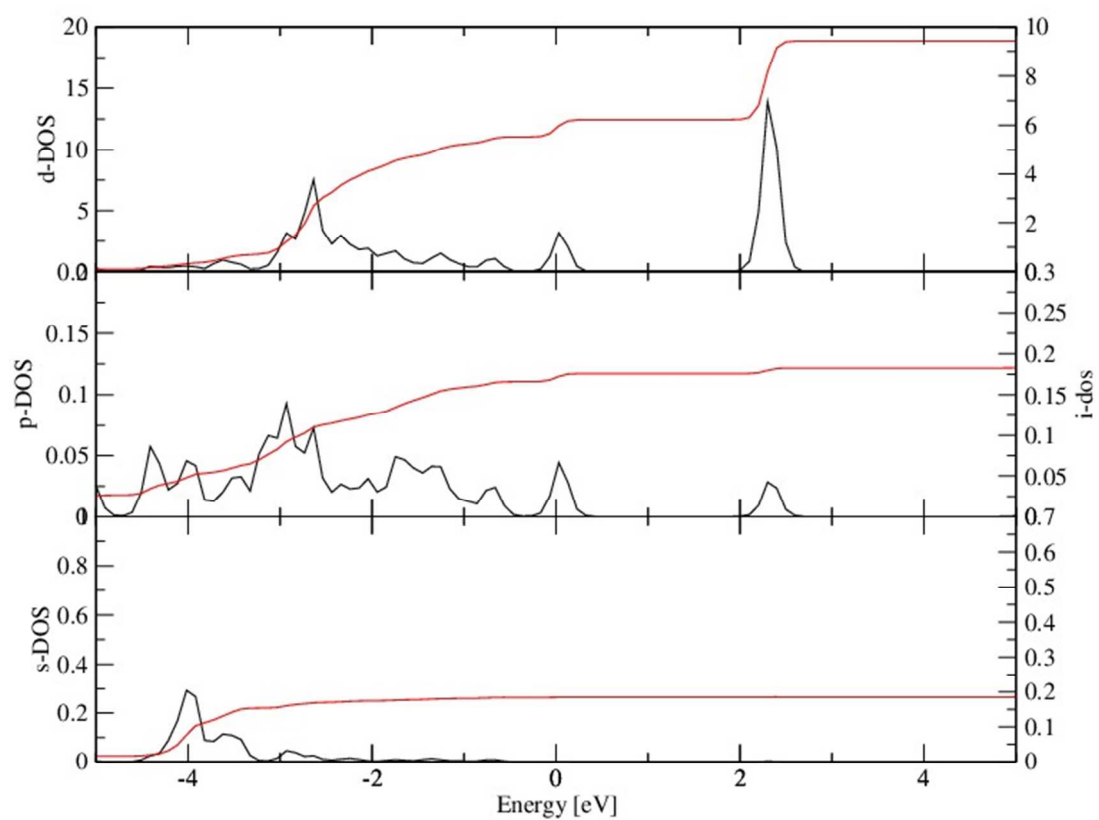

**Figure S8.** Fe DOS for 1x2x1 supercell with Fe in the Bi plane (unrelaxed structure).

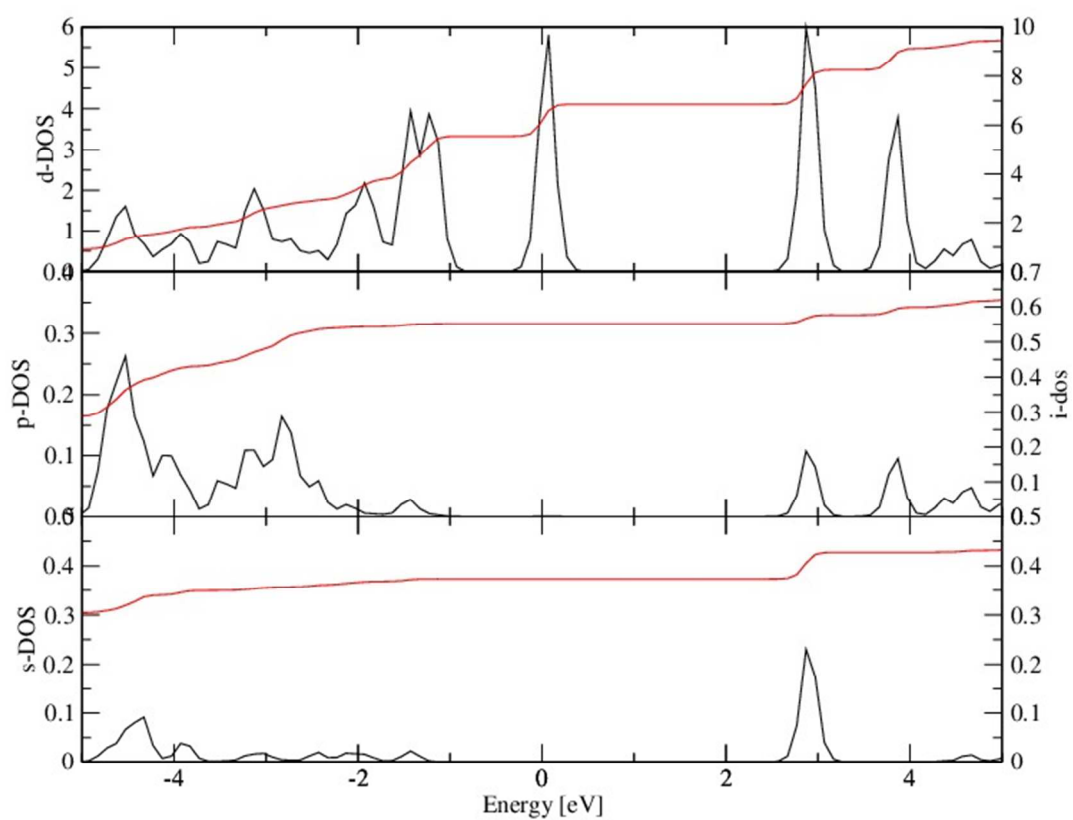

**Figure S9.** Fe DOS for 1x2x1 supercell with Fe in the O plane (relaxed structure).

## References:

1. Diemente, D., Why Is Bismuth Subchloride Soluble in Acid? *J. Chem. Educ.* **1997**, *74*, 398.
2. Hellman, H.; Laitinen, R. S.; Kaila, L.; Jalonen, J.; Hietapelto, V.; Jokela, J.; Sarpola, A.; Rämö, J., Identification of Hydrolysis Products of  $\text{FeCl}_3 \cdot 6\text{H}_2\text{O}$  by ESI-MS. *J. Mass Spectrom.* **2006**, *41*, 1421-1429.
3. Zhang, M.; Chen, K.; Chen, X.; Peng, X.; Sun, X.; Xue, D., Crystallization of FeOOH via Iron Salts: An Anion-Chemoaffinity Controlled Hydrolysis Toward High Performance Inorganic Pseudocapacitor Materials. *CrystEngComm* **2015**, *17*, 1917-1922.
4. Meighan, M.; MacNeil, J.; Falconer, R., Determining The Solubility Product of  $\text{Fe}(\text{OH})_3$ : An Equilibrium Study With Environmental Significance. *J. Chem. Educ.* **2008**, *85*, 254.
5. Chen, K.; Chen, X.; Xue, D., Hydrothermal Route to Crystallization of FeOOH Nanorods via  $\text{FeCl}_3 \cdot 6\text{H}_2\text{O}$ : Effect of  $\text{Fe}^{3+}$  Concentration on Pseudocapacitance of Iron-Based Materials. *CrystEngComm* **2015**, *17*, 1906-1910.
6. Refait, P.; Génin, J.-M., The Mechanisms of Oxidation of Ferrous Hydroxychloride  $\beta\text{-Fe}_2(\text{OH})_3\text{Cl}$  in Aqueous Solution: The Formation of Akaganeite vs Goethite. *Corros. Sci.* **1997**, *39*, 539-553.
7. Rémazeilles, C.; Refait, P., On The Formation of  $\beta\text{-FeOOH}$  (Akaganéite) in Chloride-Containing Environments. *Corros. Sci.* **2007**, *49*, 844-857.
8. Choy, J.-H.; Yoon, J.-B.; Han, K.-S., Structural Analysis of Poor Crystalline Ferrite Precursor,  $\gamma\text{-FeOOH}$ , Derived From Topotactic Hydrolysis of  $\text{FeOCl}$ . *J. Phys. IV* **1997**, *7*, C1-335-C1-336.
9. Myung, Y.; Wu, F.; Banerjee, S.; Park, J.; Banerjee, P., Electrical Conductivity of p-type  $\text{BiOCl}$  Nanosheets. *Chem. Commun.* **2015**, *51*, 2629-2632.
